# Supplementary material for: Direct Nitrate Reductase Assay versus Microscopic Observation Drug Susceptibility Test for Rapid Detection of MDR-TB in Uganda
Source: PLoS One. 2011 May 9;6(5):e19565. doi: 10.1371/journal.pone.0019565 (PMC3090408; doi:10.1371/journal.pone.0019565)
Supplement: Table S1 — Susceptibilty results of the LJPM, NRA, MODS and Genotype® MTBDRplus. (XLSX) [file pone.0019565.s001.xlsx]

## Sheet: Sheet1
Table S1
Code	LJPM-INH	LJPM-Rif	LJPM-Interp	NRA-INH	NRA-Rif	NRA-Interp	MODS-INH	MODS-Rif	MODS-Interp	GT-INH	GT-Rif	GT-Interp
1	S	S	S-Rif&INH	S	S	S-Rif&INH	R	R	MDR	S	S	S-Rif&INH
2	NG	NG	NG	NG	NG	NG	R	R	MDR	N/F-B	N/F-B	N/F-B
3	R	S	R-INH	R	R	MDR	NG	NG	NG	R	S	R-INH
4	S	S	S-Rif&INH	S	S	S-Rif&INH	R	R	MDR	S	S	S-Rif&INH
5	S	S	S-Rif&INH	NG	NG	NG	R	R	MDR	S	S	S-Rif&INH
6	R	R	MDR	R	R	MDR	R	R	MDR	R	R	MDR
7	NG	NG	NG	NG	NG	NG	R	R	MDR	N/F-B	N/F-B	N/F-B
8	S	S	S-Rif&INH	S	S	S-Rif&INH	S	S	S-Rif&INH	S	S	S-Rif&INH
9	S	S	S-Rif&INH	S	S	S-Rif&INH	R	R	MDR	S	S	S-Rif&INH
10	S	S	S-Rif&INH	S	S	S-Rif&INH	S	S	S-Rif&INH	S	S	S-Rif&INH
11	S	S	S-Rif&INH	S	S	S-Rif&INH	S	S	S-Rif&INH	S	S	S-Rif&INH
12	S	S	S-Rif&INH	S	S	S-Rif&INH	R	R	MDR	S	S	S-Rif&INH
13	R	R	MDR	S	R	R-Rif	R	R	MDR	N/F-B	N/F-B	N/F-B
14	R	R	MDR	CT	CT	CT	R	R	MDR	S	S	S-Rif&INH
15	NG	NG	NG	CT	CT	CT	R	R	MDR	S	S	S-Rif&INH
16	R	R	MDR	CT	CT	CT	CT	CT	CT	R	R	MDR
17	R	R	MDR	R	R	MDR	R	R	MDR	S	R	R-Rif
18	S	S	S-Rif&INH	R	S	R-INH	R	R	MDR	S	S	S-Rif&INH
19	S	S	S-Rif&INH	S	S	S-Rif&INH	S	S	S-Rif&INH	S	S	S-Rif&INH
20	S	S	S-Rif&INH	S	S	S-Rif&INH	S	S	S-Rif&INH	S	S	S-Rif&INH
21	S	S	S-Rif&INH	R	R	MDR	CT	CT	CT	S	S	S-Rif&INH
22	S	S	S-Rif&INH	S	S	S-Rif&INH	S	S	S-Rif&INH	S	S	S-Rif&INH
23	S	S	S-Rif&INH	S	S	S-Rif&INH	S	S	S-Rif&INH	S	S	S-Rif&INH
24	R	R	MDR	R	R	MDR	R	R	MDR	R	R	MDR
25	S	S	S-Rif&INH	S	S	S-Rif&INH	S	S	S-Rif&INH	S	S	S-Rif&INH
26	S	S	S-Rif&INH	S	S	S-Rif&INH	S	S	S-Rif&INH	S	S	S-Rif&INH
27	R	R	MDR	R	R	MDR	R	R	MDR	R	R	MDR
28	S	S	S-Rif&INH	S	S	S-Rif&INH	S	S	S-Rif&INH	S	S	S-Rif&INH
29	S	S	S-Rif&INH	R	S	R-INH	S	S	S-Rif&INH	S	S	S-Rif&INH
30	R	R	MDR	R	R	MDR	R	R	MDR	S	R	R-Rif
31	R	R	MDR	R	R	MDR	S	S	S-Rif&INH	R	R	MDR
32	NG	NG	NG	NG	NG	NG	NG	NG	NG	S	S	S-Rif&INH
33	R	R	MDR	R	R	MDR	R	R	MDR	S	R	R-Rif
34	S	S	S-Rif&INH	S	S	S-Rif&INH	S	S	S-Rif&INH	S	S	S-Rif&INH
35	S	S	S-Rif&INH	S	S	S-Rif&INH	S	S	S-Rif&INH	S	S	S-Rif&INH
36	S	S	S-Rif&INH	S	S	S-Rif&INH	S	S	S-Rif&INH	S	S	S-Rif&INH
37	S	S	S-Rif&INH	S	S	S-Rif&INH	S	S	S-Rif&INH	S	S	S-Rif&INH
38	S	S	S-Rif&INH	S	S	S-Rif&INH	S	S	S-Rif&INH	S	S	S-Rif&INH
39	R	R	MDR	R	R	MDR	NG	NG	NG	R	R	MDR
40	S	S	S-Rif&INH	S	S	S-Rif&INH	S	S	S-Rif&INH	S	S	S-Rif&INH
41	S	S	S-Rif&INH	S	S	S-Rif&INH	S	S	S-Rif&INH	S	S	S-Rif&INH
42	S	S	S-Rif&INH	S	S	S-Rif&INH	S	S	S-Rif&INH	S	S	S-Rif&INH
43	R	R	MDR	R	R	MDR	R	R	MDR	R	R	MDR
44	S	S	S-Rif&INH	S	S	S-Rif&INH	S	S	S-Rif&INH	S	S	S-Rif&INH
45	S	R	R-Rif	S	R	R-Rif	S	R	Rif-Mon Resistant	S	R	R-Rif
46	S	S	S-Rif&INH	S	S	S-Rif&INH	S	S	S-Rif&INH	S	S	S-Rif&INH
47	NG	NG	NG	NG	NG	NG	NG	NG	NG	N/F-B	N/F-B	N/F-B
48	R	R	MDR	R	R	MDR	R	R	MDR	R	R	MDR
49	S	S	S-Rif&INH	NG	NG	NG	S	S	S-Rif&INH	S	S	S-Rif&INH
50	S	S	S-Rif&INH	S	S	S-Rif&INH	S	S	S-Rif&INH	S	S	S-Rif&INH
51	CT	CT	CT	S	S	S-Rif&INH	S	S	S-Rif&INH	S	S	S-Rif&INH
52	R	S	R-INH	S	S	Fully suscept	R	S	R-INH	R	S	R-INH
53	R	S	R-INH	R	S	R-INH	R	S	R-INH	R	S	R-INH
54	R	R	MDR	R	R	MDR	R	R	MDR	R	R	MDR
55	S	S	S-Rif&INH	S	S	S-Rif&INH	S	S	S-Rif&INH	S	S	S-Rif&INH
56	R	S	R-INH	R	S	R-INH	R	R	MDR	R	R	MDR
57	R	R	MDR	R	R	MDR	R	R	MDR	R	R	MDR
58	S	S	S-Rif&INH	S	S	S-Rif&INH	S	S	S-Rif&INH	S	S	S-Rif&INH
59	CT	CT	CT	NG	NG	NG	NG	NG	NG	R	S	R-INH
60	S	S	S-Rif&INH	S	S	S-Rif&INH	S	S	S-Rif&INH	S	S	S-Rif&INH
61	S	S	S-Rif&INH	S	S	S-Rif&INH	S	S	S-Rif&INH	S	S	S-Rif&INH
62	S	S	S-Rif&INH	S	S	S-Rif&INH	S	S	S-Rif&INH	S	S	S-Rif&INH
63	S	S	S-Rif&INH	S	S	S-Rif&INH	S	S	S-Rif&INH	S	S	S-Rif&INH
64	S	S	S-Rif&INH	S	S	S-Rif&INH	S	S	S-Rif&INH	S	S	S-Rif&INH
65	S	S	S-Rif&INH	S	S	S-Rif&INH	S	S	S-Rif&INH	S	S	S-Rif&INH
66	S	S	S-Rif&INH	S	S	S-Rif&INH	S	S	S-Rif&INH	S	S	S-Rif&INH
67	S	S	S-Rif&INH	S	S	S-Rif&INH	S	S	S-Rif&INH	S	S	S-Rif&INH
68	S	R	R-Rif	S	R	R-Rif	S	R	R-Rif	S	R	R-Rif
69	R	R	MDR	R	R	MDR	R	R	MDR	R	R	MDR
70	R	R	MDR	R	R	MDR	R	R	MDR	R	R	MDR
71	S	S	S-Rif&INH	S	S	Fully suscept	S	S	S-Rif&INH	S	S	S-Rif&INH
72	S	S	S-Rif&INH	S	S	S-Rif&INH	S	S	S-Rif&INH	S	S	S-Rif&INH
73	S	S	S-Rif&INH	R	S	R-INH	S	S	S-Rif&INH	N/F-B	N/F-B	N/F-B
74	R	R	MDR	R	R	MDR	R	R	MDR	R	R	MDR
75	R	R	MDR	R	R	MDR	R	R	MDR	R	R	MDR
76	S	S	S-Rif&INH	S	S	S-Rif&INH	S	S	S-Rif&INH	S	S	S-Rif&INH
77	R	S	R-INH	R	S	R-INH	R	S	R-INH	R	R	MDR
78	S	S	S-Rif&INH	S	S	S-Rif&INH	S	S	S-Rif&INH	S	S	S-Rif&INH
79	S	S	S-Rif&INH	S	S	S-Rif&INH	S	S	S-Rif&INH	S	S	S-Rif&INH
80	R	R	MDR	R	R	MDR	R	R	MDR	R	R	MDR
81	R	S	R-INH	R	S	R-INH	R	S	R-INH	S	S	S-Rif&INH
82	R	R	MDR	R	R	MDR	R	R	MDR	R	R	MDR
83	R	R	MDR	R	R	MDR	R	R	MDR	R	R	MDR
84	S	S	S-Rif&INH	S	S	S-Rif&INH	S	S	S-Rif&INH	S	S	S-Rif&INH
85	R	R	MDR	R	R	MDR	R	R	MDR	N/F-B	N/F-B	N/F-B
86	CT	CT	CT	NG	NG	NG	NG	NG	NG	S	S	S-Rif&INH
87	S	S	S-Rif&INH	S	S	S-Rif&INH	S	S	S-Rif&INH	N/F-B	N/F-B	N/F-B
88	S	R	R-Rif	S	R	R-Rif	S	R	Rif-Mon Resistant	S	R	R-Rif
89	S	S	S-Rif&INH	S	S	S-Rif&INH	S	S	S-Rif&INH	S	S	S-Rif&INH
90	S	S	S-Rif&INH	S	S	S-Rif&INH	S	S	S-Rif&INH	S	S	S-Rif&INH
91	S	S	S-Rif&INH	S	S	S-Rif&INH	S	S	S-Rif&INH	S	S	S-Rif&INH
92	R	R	MDR	R	R	MDR	R	R	MDR	R	R	MDR
93	R	S	R-INH	NG	NG	NG	R	S	R-INH	N/F-B	N/F-B	N/F-B
94	S	S	S-Rif&INH	S	S	S-Rif&INH	S	S	S-Rif&INH	S	S	S-Rif&INH
95	S	S	S-Rif&INH	S	S	S-Rif&INH	S	S	S-Rif&INH	S	S	S-Rif&INH
96	S	S	S-Rif&INH	S	S	S-Rif&INH	S	S	S-Rif&INH	N/F-B	N/F-B	N/F-B
97	R	S	R-INH	R	S	R-INH	R	S	R-INH	S	S	S-Rif&INH
98	S	S	S-Rif&INH	S	S	S-Rif&INH	S	S	S-Rif&INH	S	S	S-Rif&INH
99	S	S	S-Rif&INH	S	R	R-Rif	S	S	S-Rif&INH	S	S	S-Rif&INH
100	R	S	R-INH	R	S	R-INH	R	S	R-INH	S	S	S-Rif&INH
101	S	S	S-Rif&INH	S	S	S-Rif&INH	S	S	S-Rif&INH	S	S	S-Rif&INH
102	S	S	S-Rif&INH	S	S	S-Rif&INH	S	S	S-Rif&INH	S	S	S-Rif&INH
103	S	S	S-Rif&INH	S	S	S-Rif&INH	S	S	S-Rif&INH	S	S	S-Rif&INH
104	R	S	R-INH	S	S	S-Rif&INH	S	S	S-Rif&INH	S	S	S-Rif&INH
105	S	S	S-Rif&INH	S	S	S-Rif&INH	S	S	S-Rif&INH	S	S	S-Rif&INH
106	S	R	R-Rif	S	R	R-Rif	S	R	Rif-Mon Resistant	S	R	R-Rif
107	S	S	S-Rif&INH	S	S	S-Rif&INH	S	S	S-Rif&INH	S	S	S-Rif&INH
108	S	S	S-Rif&INH	S	S	S-Rif&INH	S	S	S-Rif&INH	S	S	S-Rif&INH
109	S	S	S-Rif&INH	S	S	S-Rif&INH	R	S	R-INH	S	S	S-Rif&INH
110	S	S	S-Rif&INH	S	S	S-Rif&INH	S	S	S-Rif&INH	S	S	S-Rif&INH
111	S	S	S-Rif&INH	S	S	S-Rif&INH	S	S	S-Rif&INH	S	S	S-Rif&INH
112	S	S	S-Rif&INH	S	S	S-Rif&INH	S	S	S-Rif&INH	S	S	S-Rif&INH
113	S	S	S-Rif&INH	S	S	S-Rif&INH	S	S	S-Rif&INH	S	S	S-Rif&INH
114	S	S	S-Rif&INH	S	S	S-Rif&INH	NG	NG	NG	S	S	S-Rif&INH
115	S	S	S-Rif&INH	S	S	S-Rif&INH	S	S	S-Rif&INH	S	S	S-Rif&INH
116	S	S	S-Rif&INH	S	S	S-Rif&INH	S	S	S-Rif&INH	S	S	S-Rif&INH
117	S	S	S-Rif&INH	S	S	S-Rif&INH	S	S	S-Rif&INH	S	S	S-Rif&INH
118	R	R	MDR	R	R	MDR	R	R	MDR	R	R	MDR
119	R	R	MDR	R	R	MDR	R	R	MDR	R	R	MDR
120	S	S	S-Rif&INH	S	S	S-Rif&INH	S	S	S-Rif&INH	S	S	S-Rif&INH
121	R	R	MDR	R	R	MDR	R	R	MDR	R	R	MDR
122	S	S	S-Rif&INH	S	S	S-Rif&INH	S	S	S-Rif&INH	S	S	S-Rif&INH
123	S	S	S-Rif&INH	S	S	S-Rif&INH	S	S	S-Rif&INH	S	S	S-Rif&INH
124	R	S	R-INH	R	S	R-INH	R	S	R-INH	R	S	R-INH
125	S	S	S-Rif&INH	S	S	S-Rif&INH	S	S	S-Rif&INH	S	S	S-Rif&INH
126	R	S	R-INH	R	S	R-INH	R	S	R-INH	S	S	S-Rif&INH
127	R	R	MDR	R	R	MDR	R	R	MDR	R	R	MDR
128	R	R	MDR	R	R	MDR	R	R	MDR	R	R	MDR
129	S	S	S-Rif&INH	S	S	S-Rif&INH	R	S	R-INH	S	S	S-Rif&INH
130	R	R	MDR	R	R	MDR	R	R	MDR	R	R	MDR
131	R	R	MDR	R	R	MDR	R	S	R-INH	S	R	R-Rif
132	S	S	S-Rif&INH	S	S	S-Rif&INH	S	S	S-Rif&INH	S	S	S-Rif&INH
133	S	S	S-Rif&INH	S	S	S-Rif&INH	S	S	S-Rif&INH	S	S	S-Rif&INH
134	S	S	S-Rif&INH	S	S	S-Rif&INH	S	S	S-Rif&INH	S	S	S-Rif&INH
135	S	S	S-Rif&INH	S	S	S-Rif&INH	S	S	S-Rif&INH	S	S	S-Rif&INH
136	R	S	R-INH	R	S	R-INH	R	S	R-INH	S	S	S-Rif&INH
137	R	S	R-INH	R	S	R-INH	R	S	R-INH	R	S	R-INH
138	S	S	S-Rif&INH	S	S	S-Rif&INH	S	R	Rif-Mon Resistant	S	S	S-Rif&INH
139	S	S	S-Rif&INH	S	S	S-Rif&INH	S	R	Rif-Mon Resistant	S	S	S-Rif&INH
140	S	S	S-Rif&INH	S	S	S-Rif&INH	S	S	S-Rif&INH	S	S	S-Rif&INH
141	S	S	S-Rif&INH	S	S	S-Rif&INH	S	S	S-Rif&INH	S	S	S-Rif&INH
142	S	S	S-Rif&INH	S	S	S-Rif&INH	S	S	S-Rif&INH	S	S	S-Rif&INH
143	S	S	S-Rif&INH	S	S	S-Rif&INH	S	S	S-Rif&INH	S	S	S-Rif&INH
144	S	S	S-Rif&INH	S	S	S-Rif&INH	S	S	S-Rif&INH	S	S	S-Rif&INH
145	S	S	S-Rif&INH	S	S	S-Rif&INH	S	S	S-Rif&INH	S	S	S-Rif&INH
146	S	S	S-Rif&INH	S	S	S-Rif&INH	S	S	S-Rif&INH	S	S	S-Rif&INH
147	S	S	S-Rif&INH	S	S	S-Rif&INH	S	S	S-Rif&INH	S	S	S-Rif&INH
148	NG	NG	NG	S	S	S-Rif&INH	S	S	S-Rif&INH	S	S	S-Rif&INH
149	S	S	S-Rif&INH	S	S	S-Rif&INH	S	S	S-Rif&INH	S	S	S-Rif&INH
150	S	S	S-Rif&INH	S	S	S-Rif&INH	S	S	S-Rif&INH	S	S	S-Rif&INH
151	CT	CT	CT	S	S	S-Rif&INH	R	R	MDR	S	S	S-Rif&INH
152	S	S	S-Rif&INH	CT	CT	CT	NG	NG	NG	S	S	S-Rif&INH
153	S	S	S-Rif&INH	S	S	S-Rif&INH	S	S	S-Rif&INH	S	S	S-Rif&INH
154	NG	NG	NG	NG	NG	NG	NG	NG	NG	N/F-B	N/F-B	N/F-B
155	S	S	S-Rif&INH	S	S	S-Rif&INH	NG	NG	NG	S	S	S-Rif&INH
156	S	S	S-Rif&INH	S	S	S-Rif&INH	S	S	S-Rif&INH	S	S	S-Rif&INH
157	S	S	S-Rif&INH	S	S	S-Rif&INH	S	S	S-Rif&INH	S	S	S-Rif&INH
158	R	S	R-INH	R	R	MDR	R	R	MDR	R	S	R-INH
159	S	S	S-Rif&INH	NG	NG	NG	S	S	S-Rif&INH	S	S	S-Rif&INH
160	S	S	S-Rif&INH	S	S	S-Rif&INH	S	S	S-Rif&INH	S	S	S-Rif&INH
161	S	S	S-Rif&INH	S	S	S-Rif&INH	S	S	S-Rif&INH	S	S	S-Rif&INH
162	R	S	R-INH	R	S	R-INH	R	S	R-INH	R	S	R-INH
163	R	S	R-INH	R	S	R-INH	R	S	R-INH	R	S	R-INH
164	S	S	S-Rif&INH	S	S	S-Rif&INH	S	S	S-Rif&INH	S	S	S-Rif&INH
165	NG	NG	NG	NG	NG	NG	NG	NG	NG	N/F-B	N/F-B	N/F-B
166	S	S	S-Rif&INH	S	S	S-Rif&INH	S	S	S-Rif&INH	S	S	S-Rif&INH
167	S	S	S-Rif&INH	S	S	S-Rif&INH	S	S	S-Rif&INH	S	S	S-Rif&INH
168	R	R	MDR	R	R	MDR	R	R	MDR	R	R	MDR
169	NG	NG	NG	NG	NG	NG	NG	NG	NG	N/F-B	N/F-B	N/F-B
170	S	S	S-Rif&INH	S	S	S-Rif&INH	S	S	S-Rif&INH	S	S	S-Rif&INH
171	R	R	MDR	R	R	MDR	R	R	MDR	R	R	MDR
172	S	S	S-Rif&INH	S	S	S-Rif&INH	S	S	S-Rif&INH	S	S	S-Rif&INH
173	R	R	MDR	R	R	MDR	R	R	MDR	R	R	MDR
174	R	S	R-INH	R	S	R-INH	R	R	MDR	S	S	S-Rif&INH
175	S	S	S-Rif&INH	S	S	S-Rif&INH	S	S	S-Rif&INH	S	S	S-Rif&INH
176	S	S	S-Rif&INH	S	S	S-Rif&INH	S	S	S-Rif&INH	S	S	S-Rif&INH
177	S	S	S-Rif&INH	S	S	S-Rif&INH	S	S	S-Rif&INH	S	S	S-Rif&INH
178	S	S	S-Rif&INH	S	S	S-Rif&INH	S	S	S-Rif&INH	S	S	S-Rif&INH
179	R	R	MDR	NG	NG	NG	R	S	R-INH	N/F-B	N/F-B	N/F-B
180	S	S	S-Rif&INH	S	S	S-Rif&INH	S	S	S-Rif&INH	S	S	S-Rif&INH
181	S	S	S-Rif&INH	S	S	S-Rif&INH	S	S	S-Rif&INH	S	S	S-Rif&INH
182	R	R	MDR	R	R	MDR	R	R	MDR	R	R	MDR
183	S	S	S-Rif&INH	S	S	S-Rif&INH	S	S	S-Rif&INH	S	S	S-Rif&INH
184	CT	CT	CT	S	S	S-Rif&INH	S	S	S-Rif&INH	S	S	S-Rif&INH
185	CT	CT	CT	S	S	S-Rif&INH	S	S	S-Rif&INH	S	S	S-Rif&INH
186	R	S	R-INH	R	S	R-INH	R	S	R-INH	R	S	R-INH
187	S	S	S-Rif&INH	S	S	S-Rif&INH	S	S	S-Rif&INH	S	S	S-Rif&INH
188	S	S	S-Rif&INH	S	S	S-Rif&INH	S	S	S-Rif&INH	S	S	S-Rif&INH
189	S	S	S-Rif&INH	S	S	S-Rif&INH	S	S	S-Rif&INH	S	S	S-Rif&INH
190	NG	NG	NG	NG	NG	NG	S	S	S-Rif&INH	S	S	S-Rif&INH
191	R	R	MDR	R	R	MDR	R	R	MDR	R	R	MDR
192	S	S	S-Rif&INH	S	S	S-Rif&INH	R	S	R-INH	S	S	S-Rif&INH
193	R	R	MDR	R	R	MDR	S	S	S-Rif&INH	N/F-B	N/F-B	N/F-B
194	R	R	MDR	R	R	MDR	S	S	S-Rif&INH	N/F-B	N/F-B	N/F-B
195	S	S	S-Rif&INH	S	S	S-Rif&INH	S	S	S-Rif&INH	S	S	S-Rif&INH
196	NG	NG	NG	R	S	R-INH	R	S	R-INH	R	S	R-INH
197	CT	CT	CT	S	S	S-Rif&INH	S	S	S-Rif&INH	S	S	S-Rif&INH
198	S	S	S-Rif&INH	S	S	S-Rif&INH	S	S	S-Rif&INH	S	S	S-Rif&INH
199	S	S	S-Rif&INH	S	S	S-Rif&INH	S	S	S-Rif&INH	S	S	S-Rif&INH
200	S	S	S-Rif&INH	S	S	S-Rif&INH	S	S	S-Rif&INH	S	S	S-Rif&INH
201	S	S	S-Rif&INH	S	S	S-Rif&INH	S	S	S-Rif&INH	S	S	S-Rif&INH
202	S	S	S-Rif&INH	S	S	S-Rif&INH	S	S	S-Rif&INH	S	S	S-Rif&INH
203	S	S	S-Rif&INH	S	S	S-Rif&INH	S	S	S-Rif&INH	S	S	S-Rif&INH
204	S	S	S-Rif&INH	S	S	S-Rif&INH	S	S	S-Rif&INH	S	S	S-Rif&INH
205	S	S	S-Rif&INH	S	S	S-Rif&INH	S	S	S-Rif&INH	S	S	S-Rif&INH
206	R	S	R-INH	S	S	S-Rif&INH	S	S	S-Rif&INH	R	S	R-INH
207	S	S	S-Rif&INH	S	S	S-Rif&INH	S	S	S-Rif&INH	S	S	S-Rif&INH
208	R	R	MDR	R	R	MDR	S	S	S-Rif&INH	R	R	MDR
209	S	S	S-Rif&INH	S	S	S-Rif&INH	S	S	S-Rif&INH	S	S	S-Rif&INH
210	R	R	MDR	R	R	MDR	R	R	MDR	R	R	MDR
211	S	S	S-Rif&INH	S	S	S-Rif&INH	S	S	S-Rif&INH	S	S	S-Rif&INH
212	S	S	S-Rif&INH	S	S	S-Rif&INH	S	S	S-Rif&INH	S	S	S-Rif&INH
213	S	S	S-Rif&INH	S	S	S-Rif&INH	S	S	S-Rif&INH	S	S	S-Rif&INH
214	S	S	S-Rif&INH	S	S	S-Rif&INH	S	S	S-Rif&INH	S	S	S-Rif&INH
215	S	S	S-Rif&INH	S	S	S-Rif&INH	S	S	S-Rif&INH	S	S	S-Rif&INH
216	S	S	S-Rif&INH	S	S	S-Rif&INH	S	S	S-Rif&INH	S	S	S-Rif&INH
217	S	S	S-Rif&INH	S	S	S-Rif&INH	S	S	S-Rif&INH	S	S	S-Rif&INH
218	S	S	S-Rif&INH	S	S	S-Rif&INH	S	S	S-Rif&INH	S	S	S-Rif&INH
219	S	S	S-Rif&INH	S	S	S-Rif&INH	S	S	S-Rif&INH	N/F-B	N/F-B	N/F-B
220	S	S	S-Rif&INH	R	S	R-INH	R	S	R-INH	R	S	R-INH
221	S	S	S-Rif&INH	S	S	S-Rif&INH	S	S	S-Rif&INH	S	S	S-Rif&INH
222	R	S	R-INH	R	S	R-INH	R	S	R-INH	R	R	MDR
223	R	R	MDR	S	S	S-Rif&INH	S	S	S-Rif&INH	S	S	S-Rif&INH
224	R	S	R-INH	R	S	R-INH	R	S	R-INH	S	S	S-Rif&INH
225	S	S	S-Rif&INH	S	S	S-Rif&INH	S	S	S-Rif&INH	S	S	S-Rif&INH
226	S	S	S-Rif&INH	S	S	S-Rif&INH	S	S	S-Rif&INH	S	S	S-Rif&INH
227	S	S	S-Rif&INH	R	S	R-INH	S	S	S-Rif&INH	S	S	S-Rif&INH
228	S	S	S-Rif&INH	S	S	S-Rif&INH	R	S	R-INH	R	S	R-INH
229	S	S	S-Rif&INH	S	S	S-Rif&INH	S	S	S-Rif&INH	S	S	S-Rif&INH
230	R	S	R-INH	R	S	R-INH	S	S	S-Rif&INH	R	S	R-INH
231	S	S	S-Rif&INH	S	S	S-Rif&INH	S	S	S-Rif&INH	S	S	S-Rif&INH
232	R	R	MDR	R	R	MDR	R	S	R-INH	R	R	MDR
233	NG	NG	NG	NG	NG	NG	R	R	MDR	S	S	S-Rif&INH
234	R	R	MDR	R	R	MDR	R	R	MDR	R	R	MDR
235	S	S	S-Rif&INH	S	S	S-Rif&INH	S	S	S-Rif&INH	S	S	S-Rif&INH
236	S	S	S-Rif&INH	S	S	S-Rif&INH	S	S	S-Rif&INH	S	S	S-Rif&INH
237	S	S	S-Rif&INH	S	S	S-Rif&INH	S	S	S-Rif&INH	S	S	S-Rif&INH
238	S	S	S-Rif&INH	S	S	S-Rif&INH	S	S	S-Rif&INH	S	S	S-Rif&INH
239	S	S	S-Rif&INH	S	S	S-Rif&INH	S	S	S-Rif&INH	S	S	S-Rif&INH
240	S	S	S-Rif&INH	S	S	S-Rif&INH	S	S	S-Rif&INH	S	S	S-Rif&INH
241	R	S	S-Rif&INH	R	S	R-INH	R	S	R-INH	R	S	R-INH
242	S	S	S-Rif&INH	S	S	S-Rif&INH	NG	NG	NG	S	S	S-Rif&INH
243	S	S	S-Rif&INH	R	S	R-INH	NG	NG	NG	S	S	S-Rif&INH
244	S	S	S-Rif&INH	S	S	S-Rif&INH	S	S	S-Rif&INH	S	S	S-Rif&INH
245	S	S	S-Rif&INH	S	S	S-Rif&INH	S	S	S-Rif&INH	S	S	S-Rif&INH
Key to abrreviations
CT = Contaminated cultures				MODS = Microscopic Observation Drug Susceptibilty					Rif = Rifampicin
GT = Genotype MTBDRplus				N/F-B = No or faint bands					R-INH = Mono resistant to isoniazid
INH = Isoniazid				NG = No growth					R-Rif = Mono resistant to rifampicin
Interp = Interpretation				NRA = Nitrate ReduCTase assay					S = Susceptible
LJPM = Lowenstein-Jensen Proportion method				R = Resistant					S-Rif&INH = Susceptible to rifampicin and isoniazid

## Sheet: Sheet2
Ct	contaminated
ND	No data
NG	No growth
NR	No results
UG	Unger growth
